# Supplementary material for: Electronic interaction of ruthenium species on bimetallic phosphide for superior electrocatalytic hydrogen generation
Source: Royal Society of Chemistry journal article supplement (doi:10.1039/d3dt01786a), 2023-01-01
Supplement: d3dt01786a1.pdf [file d3dt01786a1.pdf]

## Supporting Information

# Electronic Interaction of Ruthenium Species on Bimetallic Phosphide for Superior Electrocatalytic Hydrogen Generation

*Yiming Guo<sup>+</sup>, Guorong Zhou<sup>+</sup> and Yun Tong\**

School of Chemistry and Chemical Engineering, Key Laboratory of Surface & Interface Science of Polymer Materials of Zhejiang Province, Zhejiang Sci-Tech University, Hangzhou 310018, Zhejiang, China (Email: tongyun@mail.ustc.edu.cn)

Correspondence and requests for materials should be addressed to Y. Tong (E-mail: tongyun@mail.ustc.edu.cn)

## Table of contents

|                                                                                                                                                                                              |    |
|----------------------------------------------------------------------------------------------------------------------------------------------------------------------------------------------|----|
| <b>Figure S1</b> The XRD pattern of NiCoP sample. ....                                                                                                                                       | 3  |
| <b>Figure S2</b> The SEM images of NiCoP/NF sample.....                                                                                                                                      | 3  |
| <b>Figure S3</b> The TEM images of NiCoP sample.....                                                                                                                                         | 4  |
| <b>Figure S4</b> The XPS survey of NiCoP/NF sample. ....                                                                                                                                     | 4  |
| <b>Figure S5</b> The XPS survey of Ru-NiCoP/NF sample. ....                                                                                                                                  | 5  |
| <b>Figure S6</b> CV curves for (a) NF, (b) NiCo-Pre/NF, (c) Ru-NiCo-Pre/NF, (d) NiCoP/NF and (e) Ru-NiCoP/NF under different scan rates from 20 to 100 mV s <sup>-1</sup> in 1.0 M KOH. .... | 6  |
| <b>Figure S7</b> The ECSA values of the prepared samples.....                                                                                                                                | 7  |
| <b>Figure S8</b> The ECSA normalized polarization curves of the prepared catalysts. ....                                                                                                     | 7  |
| <b>Figure S9</b> The polarization curves of Ru-NiCoP/NF samples with using different amount of Ru sources. ....                                                                              | 8  |
| <b>Figure S10</b> The EIS spectra of the prepared catalysts in 1 M KOH solution.....                                                                                                         | 9  |
| <b>Figure S11</b> The XRD pattern of the Ru-NiCoP/NF sample after HER test. ....                                                                                                             | 10 |
| <b>Figure S12</b> The SEM images of the Ru-NiCoP/NF sample after HER test. ....                                                                                                              | 11 |
| <b>Figure S13</b> The XPS survey of the Ru-NiCoP/NF sample after HER test.....                                                                                                               | 11 |
| <b>Figure S14</b> The XPS spectra of the Ru-NiCoP/NF sample after HER test, (a) Co 2p, (b) Ni 2p, (c) Ru 3d and P 2p. ....                                                                   | 12 |

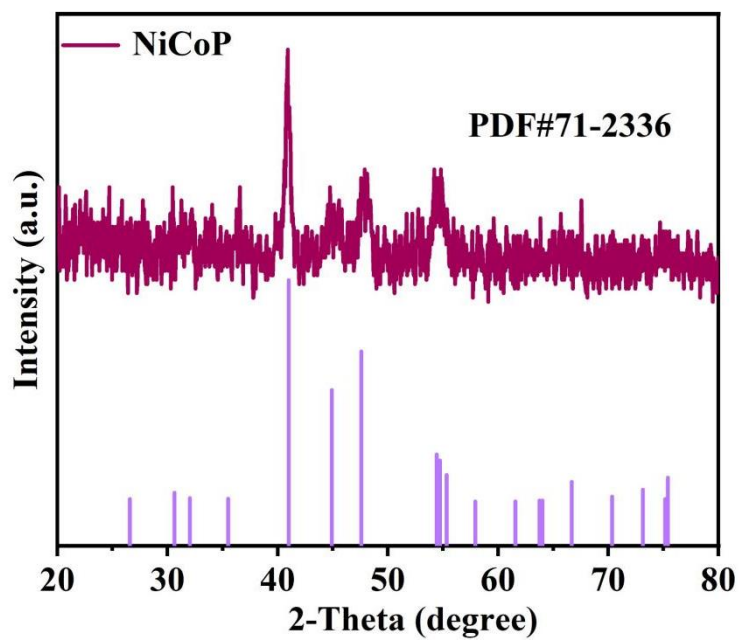

**Figure S1** The XRD pattern of NiCoP sample.

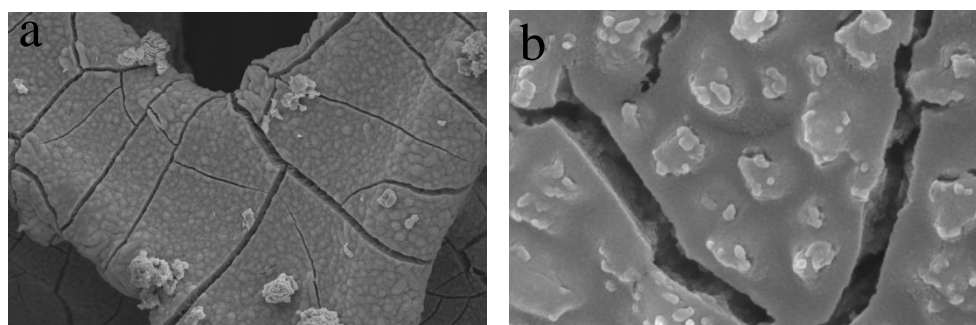

**Figure S2** The SEM images of NiCoP/NF sample.

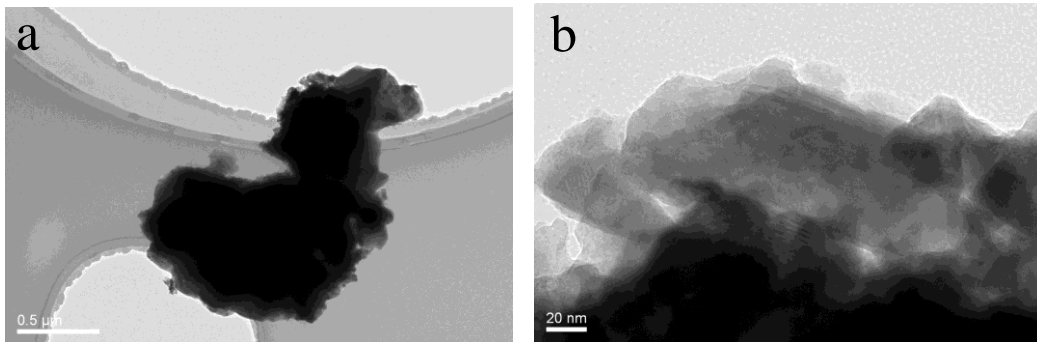

**Figure S3** The TEM images of NiCoP sample.

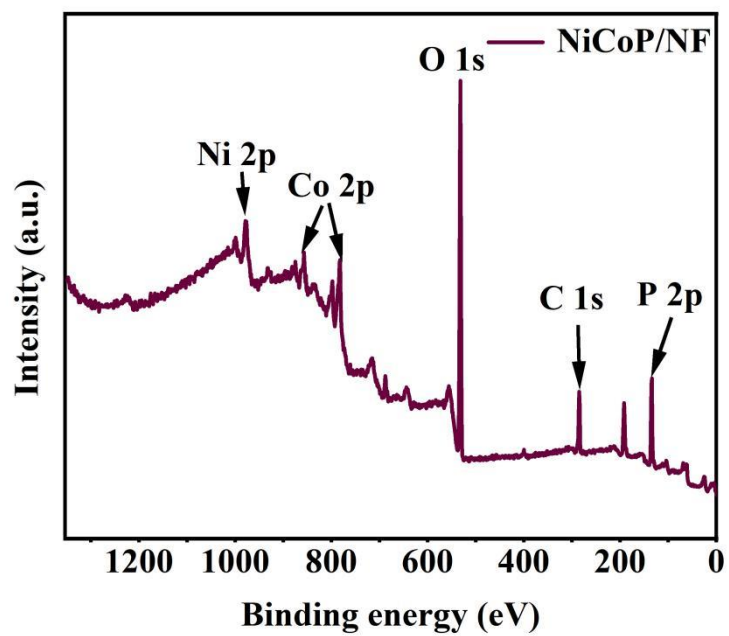

**Figure S4** The XPS survey of NiCoP/NF sample.

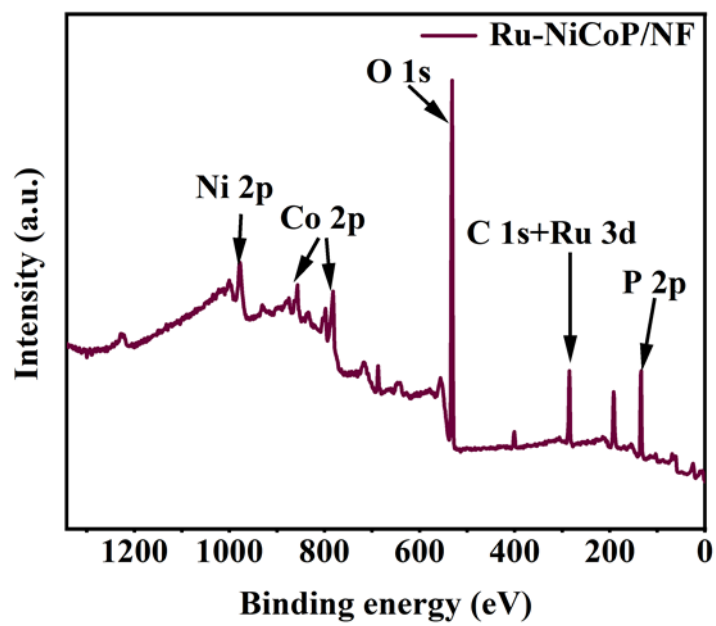

**Figure S5** The XPS survey of Ru-NiCoP/NF sample.

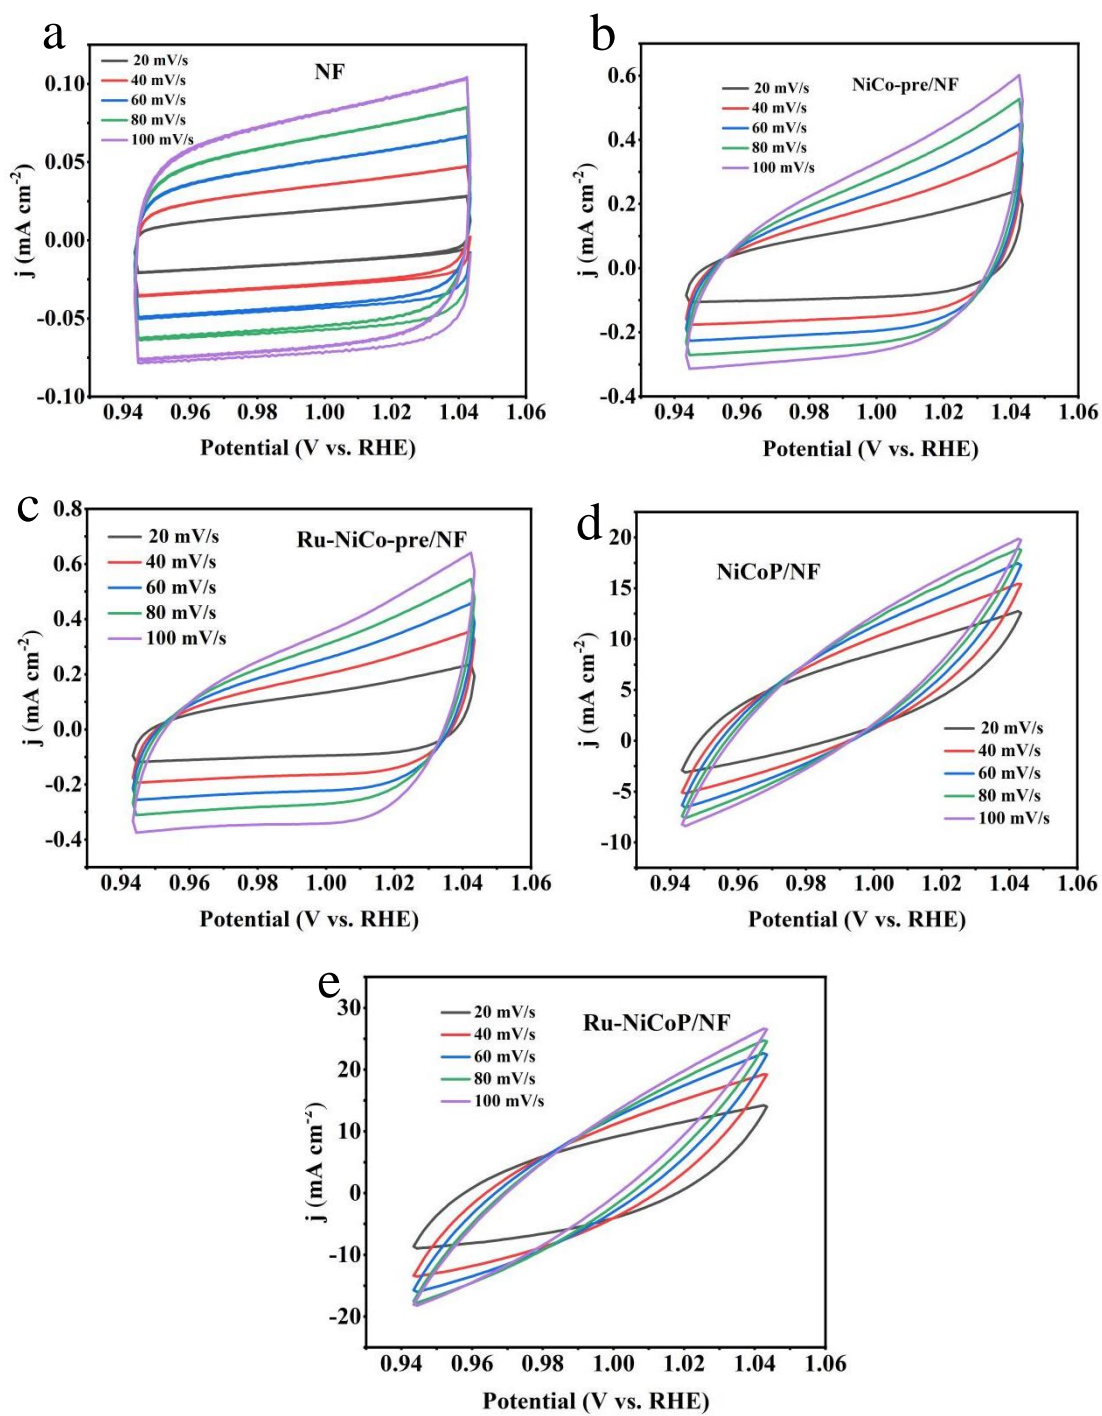

**Figure S6** CV curves for (a) NF, (b) NiCo-Pre/NF, (c) Ru-NiCo-Pre/NF, (d) NiCoP/NF and (e) Ru-NiCoP/NF under different scan rates from 20 to 100  $\text{mV s}^{-1}$  in 1.0 M KOH.

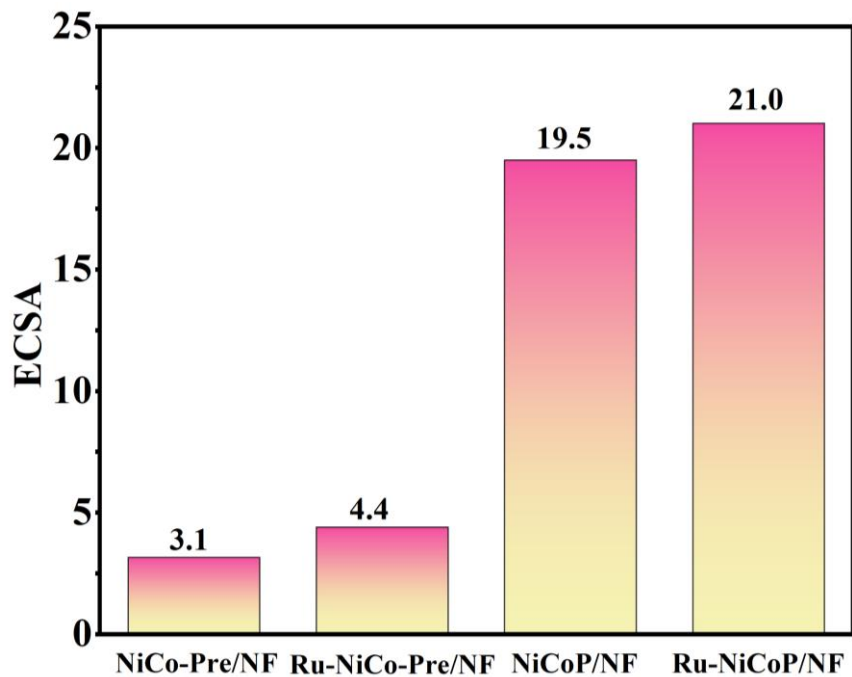

**Figure S7** The ECSA values of the prepared samples.

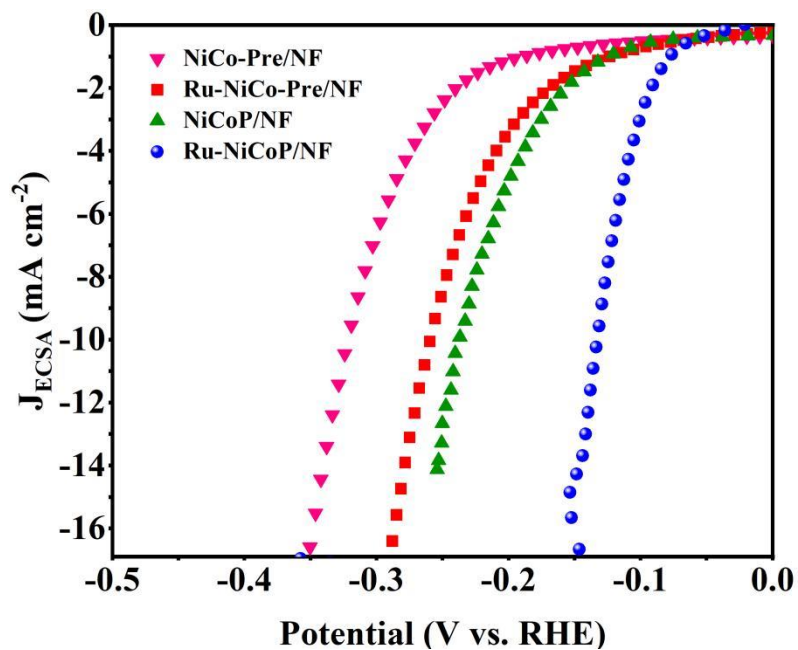

**Figure S8** The ECSA normalized polarization curves of the prepared catalysts.

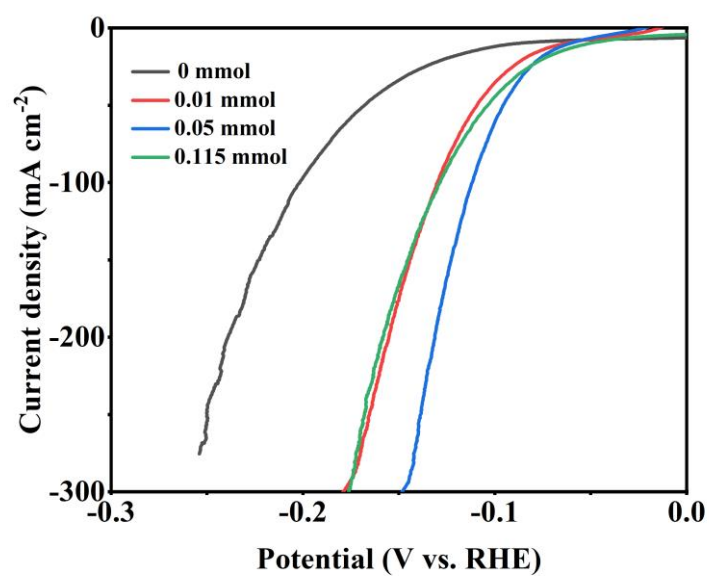

**Figure S9** The polarization curves of Ru-NiCoP/NF samples with using different amount of Ru sources.



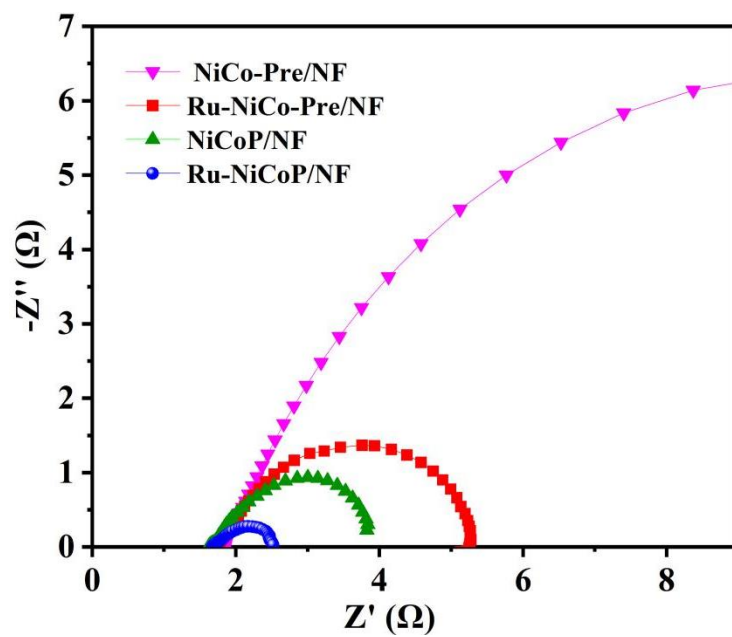

**Figure S10** The EIS spectra of the prepared catalysts in 1 M KOH solution.

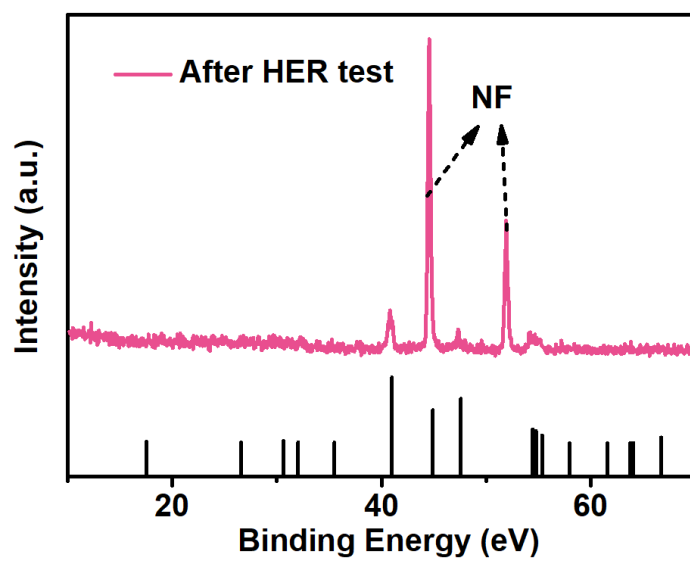

**Figure S11** The XPS pattern of the Ru-NiCoP/NF sample after HER test.

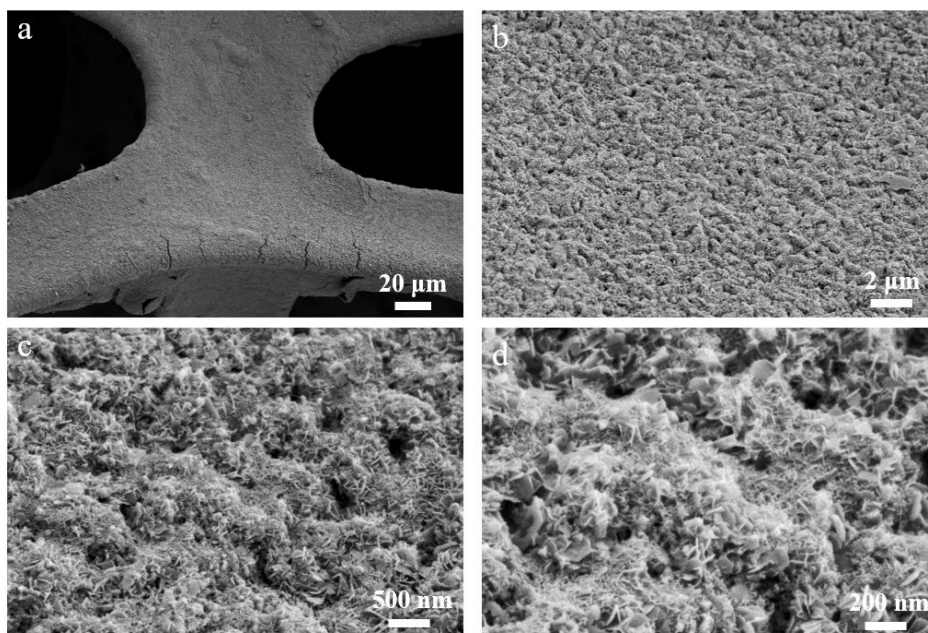

**Figure S12** The SEM images of the Ru-NiCoP/NF sample after HER test.

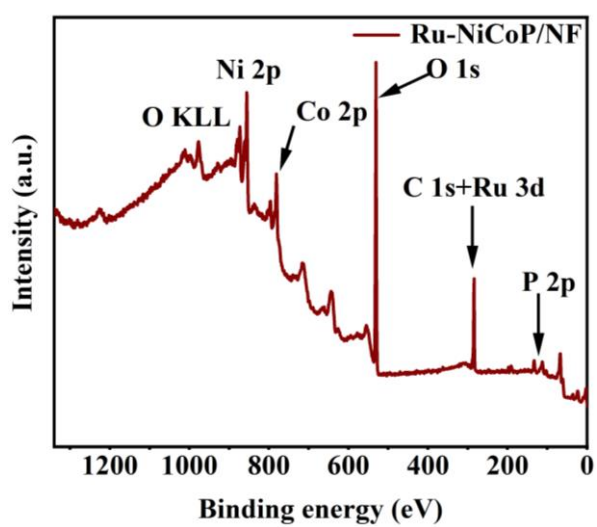

**Figure S13** The XPS survey of the Ru-NiCoP/NF sample after HER test.

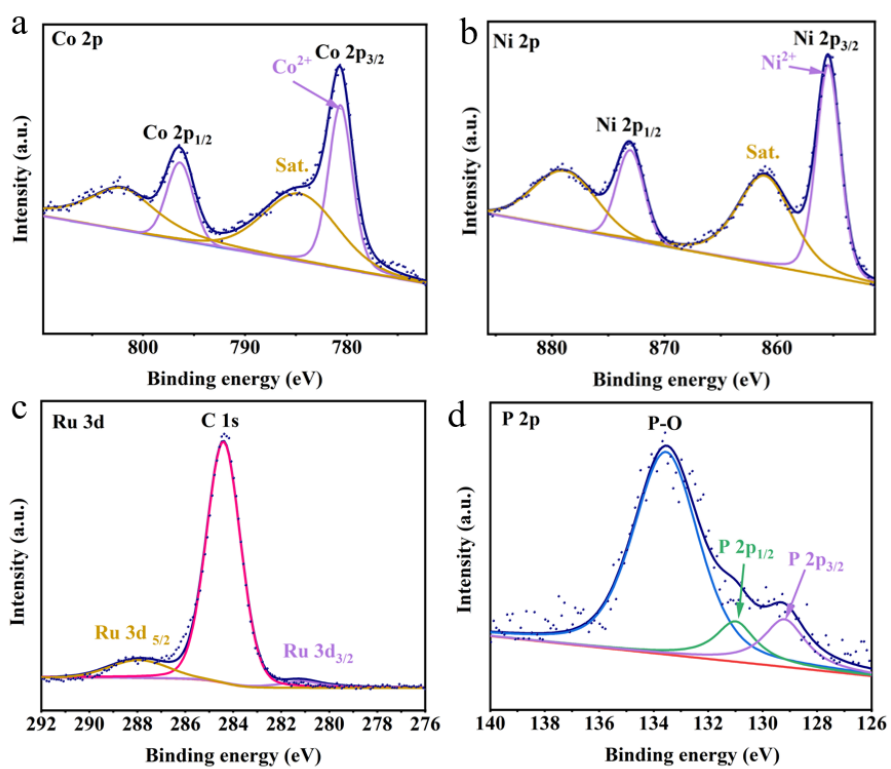

**Figure S14** The XPS spectra of the Ru-NiCoP/NF sample after HER test, (a) Co 2p, (b) Ni 2p, (c) Ru 3d and P 2p.
